# Supplementary material for: First description of Leishmania (Viannia) infection in Evandromyia saulensis, Pressatia sp. and Trichophoromyia auraensis (Psychodidae: Phlebotominae) in a transmission area of cutaneous leishmaniasis in Acre state, Amazon Basin, Brazil
Source: PubMed Central journal article supplement (PMC5225531; doi:10.1590/0074-02760160283), 2017-01
Supplement: 0074-0276-mioc-112-1-0075-suppl01.pdf [file 0074-0276-mioc-112-1-0075-suppl01.pdf]

TABLE  
Results for the major hits obtained after BLAST analysis of the 234 bp-hsp70C polymerase chain reaction and sequencing

| Sample                               | Description                                                                                                         | Max score | Total score | Query cover | E value   | Max identity | Accession number            |
|--------------------------------------|---------------------------------------------------------------------------------------------------------------------|-----------|-------------|-------------|-----------|--------------|-----------------------------|
| 2 - <i>Evandromyia saulensis</i>     | <i>Leishmania braziliensis</i> MHOM/BR/75/M2904 putative heat-shock protein hsp70 (LBRM_28_2970) mRNA, partial cds  | 261       | 261         | 78%         | 2,00E-66  | 96%          | gi 389601962 XM_001566273.2 |
| 6 - <i>Trichophoromyia auraensis</i> | <i>L. braziliensis</i> MHOM/BR/75/M2904 putative heat-shock protein hsp70 (LBRM_28_2970) mRNA, partial cds          | 217       | 217         | 97%         | 2,00E-53  | 97%          | gi 389601962 XM_001566273.2 |
| 3 - <i>Pressatia</i> sp              | <i>L. braziliensis</i> MHOM/BR/75/M2904 putative heat-shock protein hsp70 (LBRM_28_2970) mRNA, partial cds          | 250       | 250         | 100%        | 3,00E-63  | 95%          | gi 389601962 XM_001566273.2 |
| 11 - <i>Th. auraensis</i>            | <i>L. braziliensis</i> MHOM/BR/75/M2904 putative heat-shock protein hsp70 (LBRM_28_2970) mRNA, partial cds          | 289       | 289         | 100%        | 6,00E-75  | 100%         | gi 389601962 XM_001566273.2 |
| 5 - <i>Th. auraensis</i>             | <i>L. braziliensis</i> strain MHOM/BR/2002/NMT-LTCP 14440-P clone B heat shock protein 70 (hsp70) gene, partial cds | 379       | 379         | 100%        | 5,00E-102 | 99%          | gi 316891027 GU368187.1     |

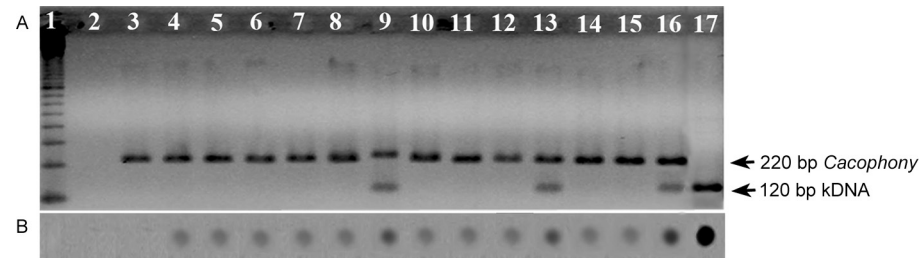

Fig. 1: natural infection by *Leishmania* spp in sandflies. (A) multiplex polymerase chain reaction (PCR) directed to the 220 bp fragment of the cacophony gene (sandflies) and the 120 bp of kDNA conserved minicircle sequence (*Leishmania* spp.) was performed individually in 173 sandfly DNA extracts. Amplified products were visualised on 2% agarose gel stained with ethidium bromide. 1: molecular weight 100 bp DNA ladder (Invitrogen); 2: negative control for PCR reaction (no DNA added); 3: negative control for DNA extraction (DNA extracted from male sandflies); 4-15: single female sandflies subjected to molecular diagnosis that revealed positivity in two samples (lines 9 and 13); 16: positive control (DNA extracted from laboratory-bred *Lutzomyia longipalpis* females); 17: positive control (DNA from cultivated *L. (V.) braziliensis*) [10 ng]. (B) dot blot hybridisation of PCR-amplified products with a specific byotinylated probe for *Leishmania* subgenus *Viannia*. 4-5: *Evandromyia saulensis* - Area of forest (area I); 6: *Pressatia* sp. - Area of forest (area II); 7-15: *Trichophoromyia auraensis* - Area of forest (area II); 16: positive control (DNA extracted from laboratory-bred *Lu. longipalpis* females); 17: positive control (DNA from cultivated *L. (V.) braziliensis*).

```
>11_Trichophoromyia auraensis
GATGCGTCGAAGTACGAGCAGGCCGACAAGATGCAGCGCGAGCGCGTGGAGGCCGAAGAACGGCCTGGA
GAACTACGCGTACTCGATGAAGAACACGGTCTCCGACACGAACGTGTCCGGCAAGCTGGAGGA
>3_Pressatia sp
CAACCAGGAGGCGTCGAAGGAAGAGCAGGCCGACAAGATGCAGCGCGAGCGCGTGGAGGCCGAAGAACG
GCCTGGAGAACTACGCGTACTCGATGAAGAACACGGTCTCCGACACGAACGTGTCCGGCAAGCTGGAC
GAGATCGA
>6_Trichophoromyia auraensis
CGTCGAAGGAAGAGCAGGCCGACAAGATGCAGCGCGAGCGCGTGGAGGCCGAAGGACGGCCTGGAGAAC
TACGCGTACTCGATGAAGAACACGGTCTCCGACACGAACGTGTCCGGCAAGCTGGACGAGATCG
>5_Trichophoromyia auraensis
GATGCGTCGAAGTGCAGCAGGCCGACAAGATGCAGCGCGAGCGCGTGGAGGCCGAAGAACGGCCTGGA
GAACTACGCGTACTCGATGAAGAACACGGTCTCCGACACGAATGTGTCCGGCAAGCTGGAGGAGAGCG
ACAGGTCCGCGCTGAACTCGGCGATCGACACGGCGCTGGAGTGGCTGAAC
>2_Evandromyia saulensis
GATGCGTCGAAGGAAGAGCAGGCCGACAAGGTGCAGCGCGAGCGCGTGGAGGCCGAAGAACGGCCTGGA
GAACTACGCGTACTCGATGAAGAACACGGTCTCCGACACGAACGTGTCCGGCAAGCTGKACGAGACG
```

Fig. 2: edited consensus sequences of the 234 bp-*hsp70C* polymerase chain reaction products.
